# Supplementary material for: Reshaping the epigenetic landscape during early flower development: induction of attractor transitions by relative differences in gene decay rates
Source: PubMed Central journal article supplement (PMC4438470; doi:10.1186/s12918-015-0166-y), 2015-05-13

## Additional File 2

### Results of the Bifurcation (Phase transition) Analysis.

Set of graphs, one per each gene expressed in each attractor. In the graph we plotted the initial attractor state and its progressive change resulting from altering the decay parameter. This file included the graphs for all the 10 attractors (and their genes) in the following page order.

Carpel attractor (*Car*) - 2  
Inflorescence 1 attractor (*Inf1*) - 3  
Inflorescence 2 attractor (*Inf2*) - 4  
Inflorescence 3 attractor (*Inf3*) - 5  
Inflorescence 4 attractor (*Inf4*) - 6  
Petal attractor 1 (*Pe1*) - 7  
Petal attractor 1 (*Pe2*) - 8  
Sepal attractor (*Sep*) - 9  
Stamen attractor 1 (*St1*) - 10  
Stamen attractor 2 (*St2*) - 11

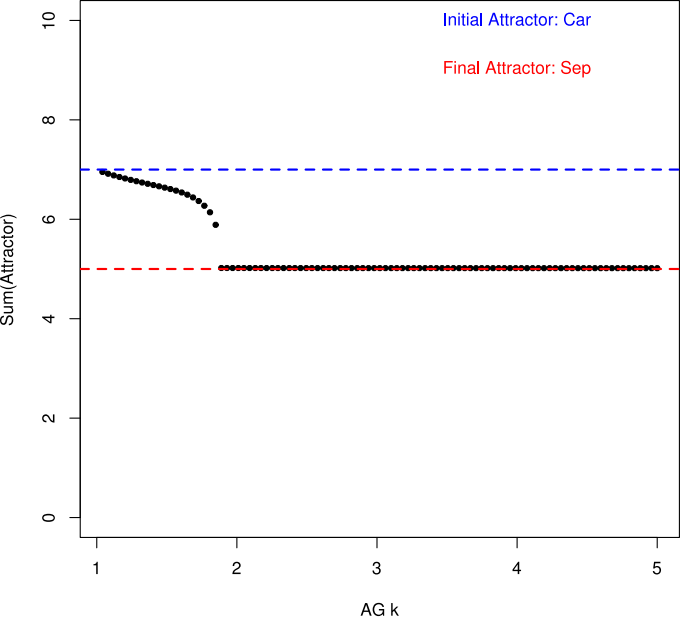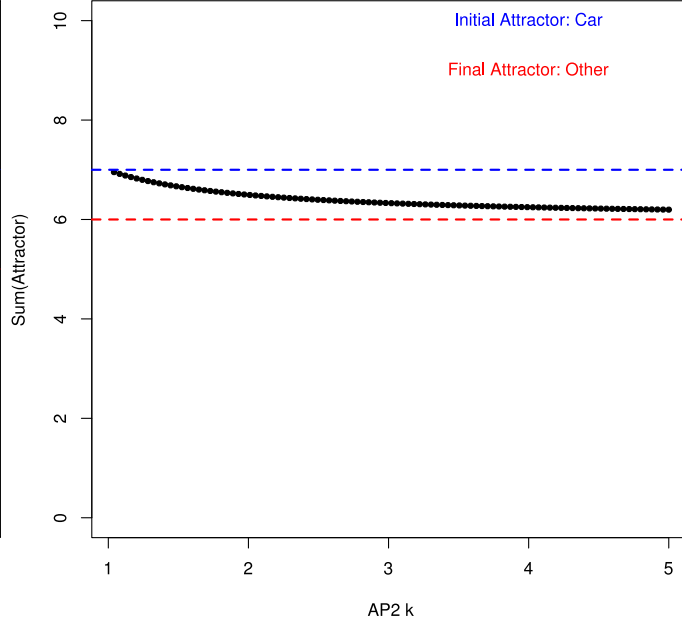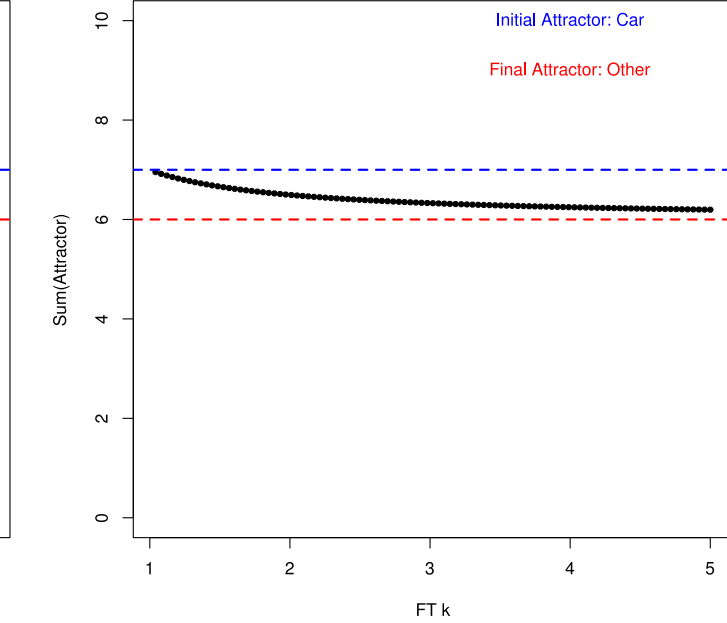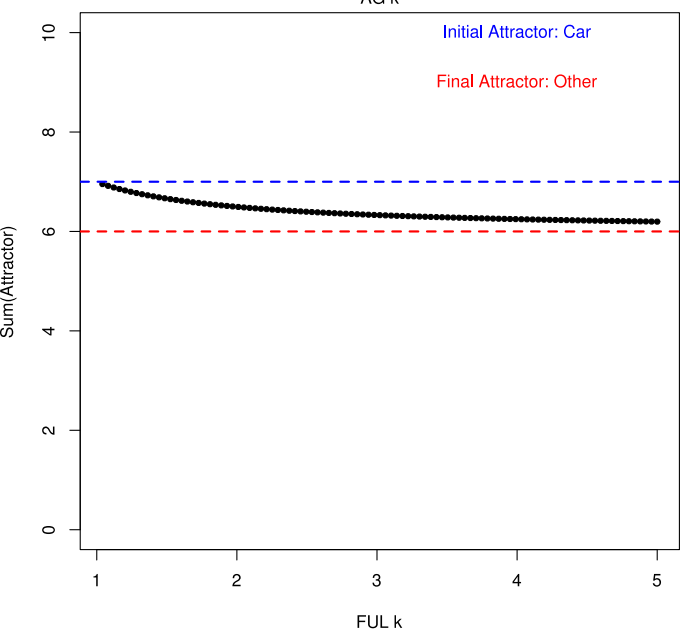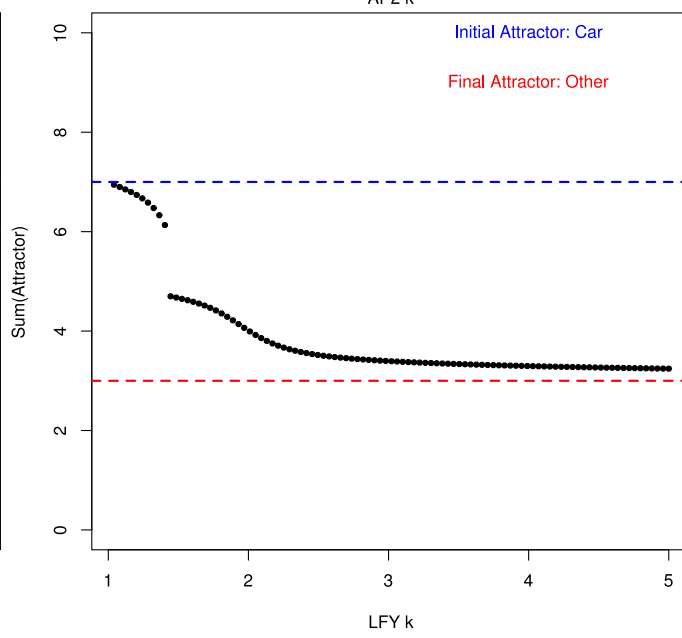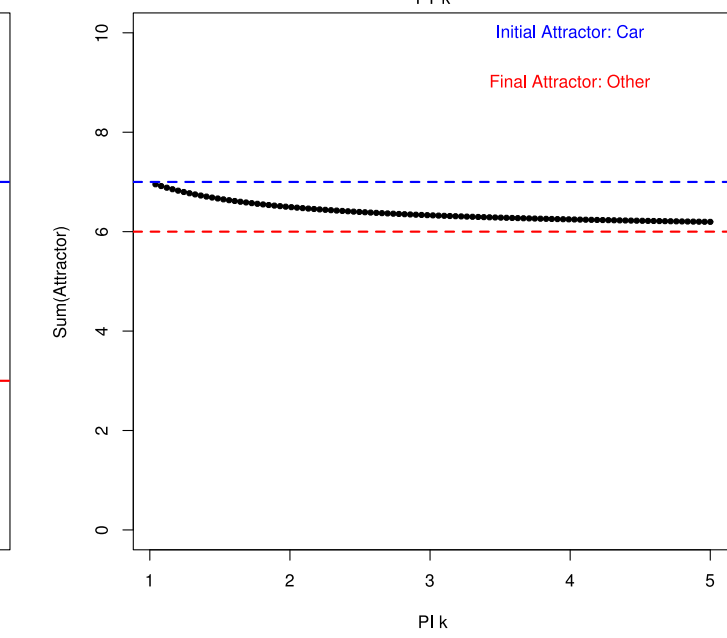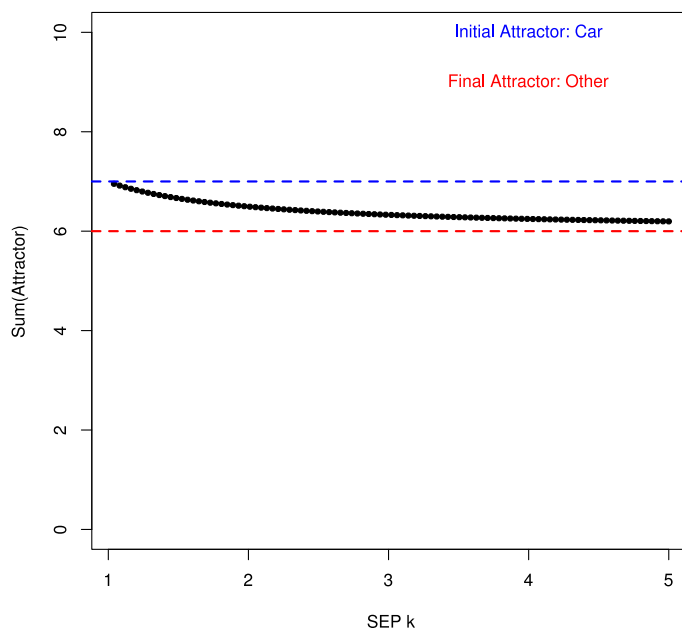

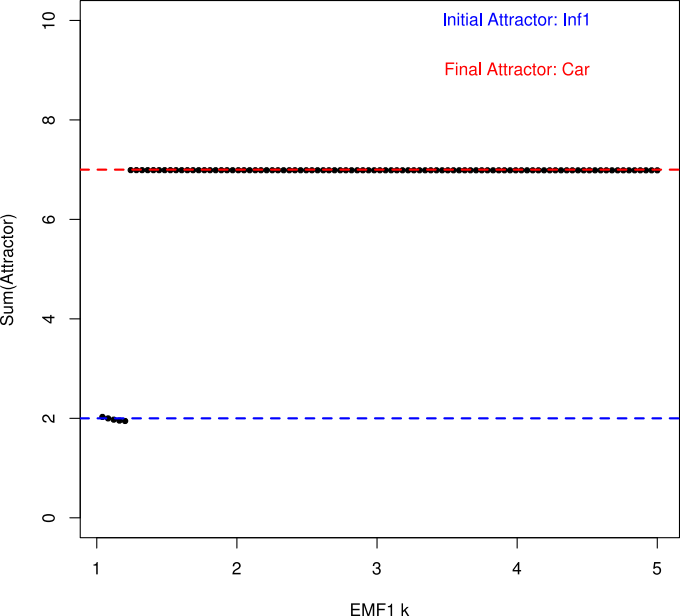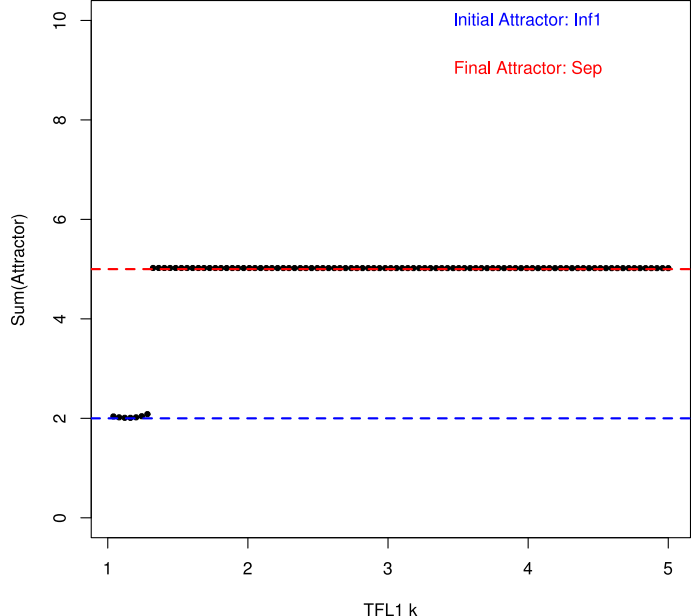

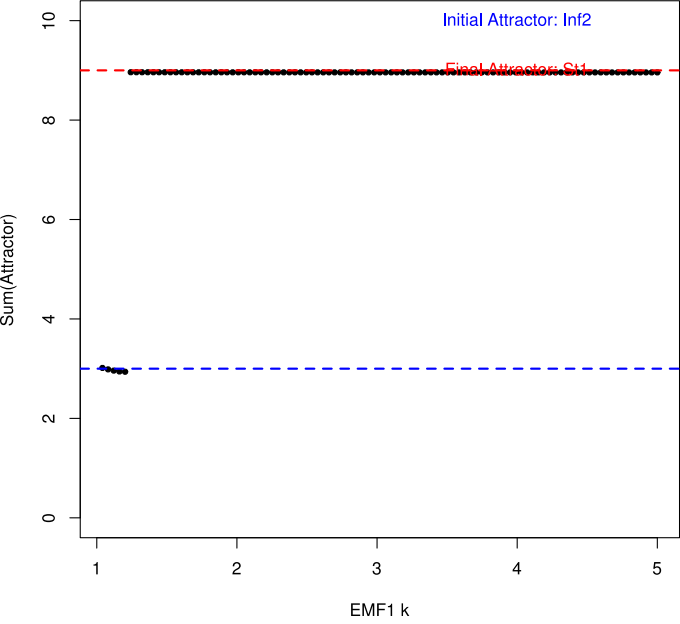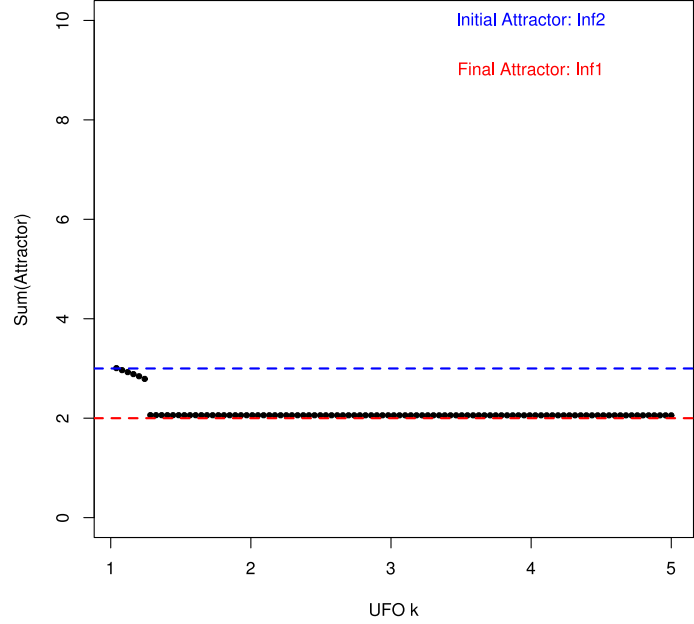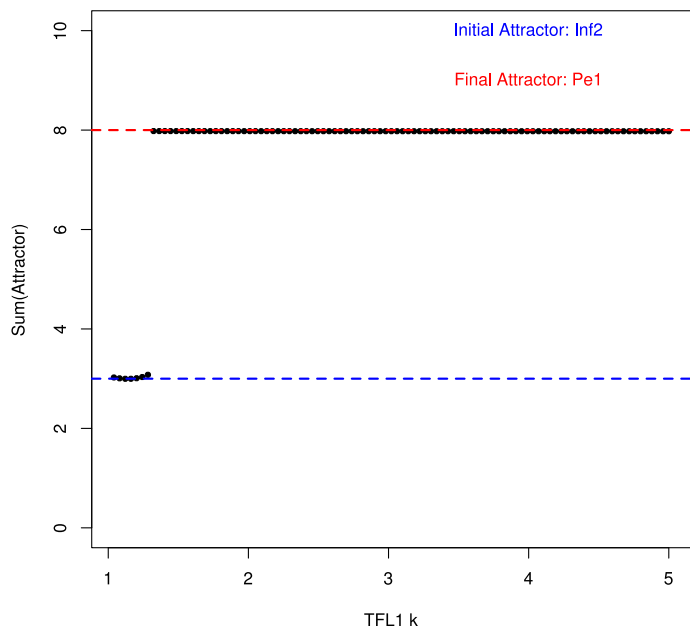

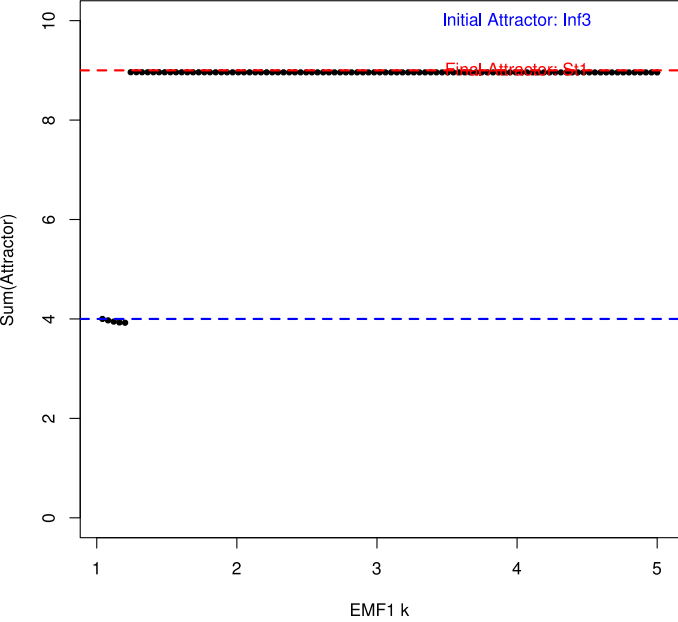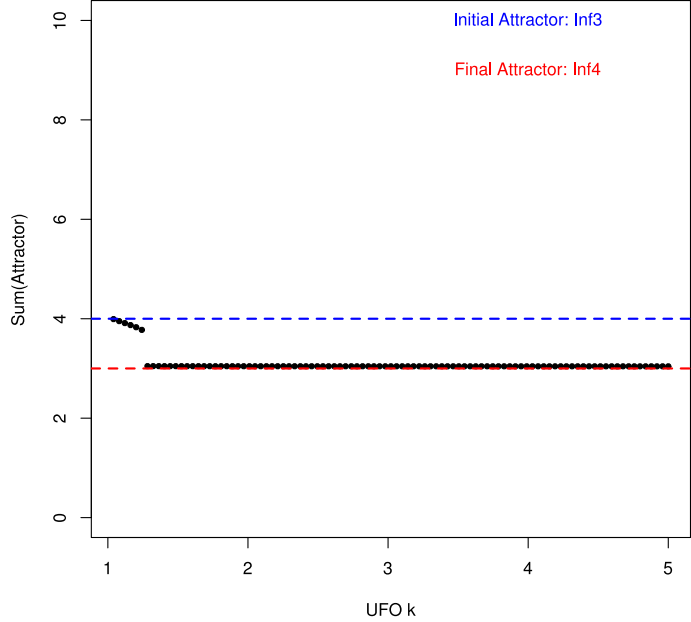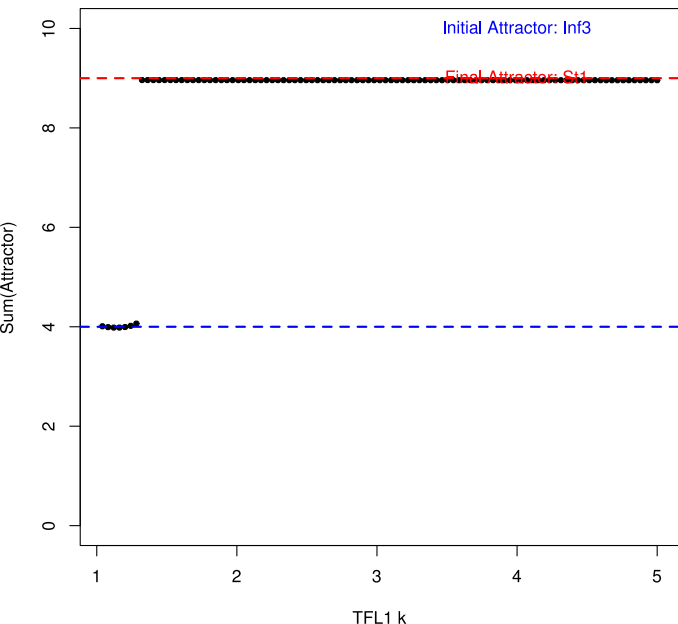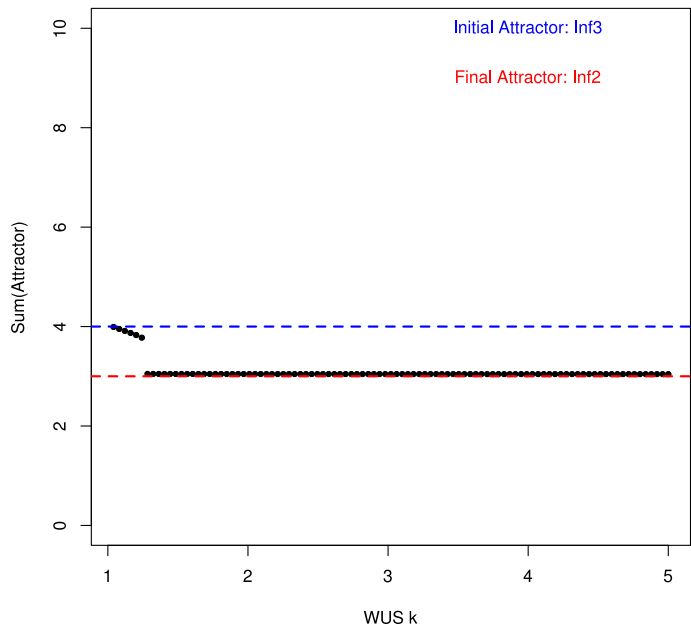

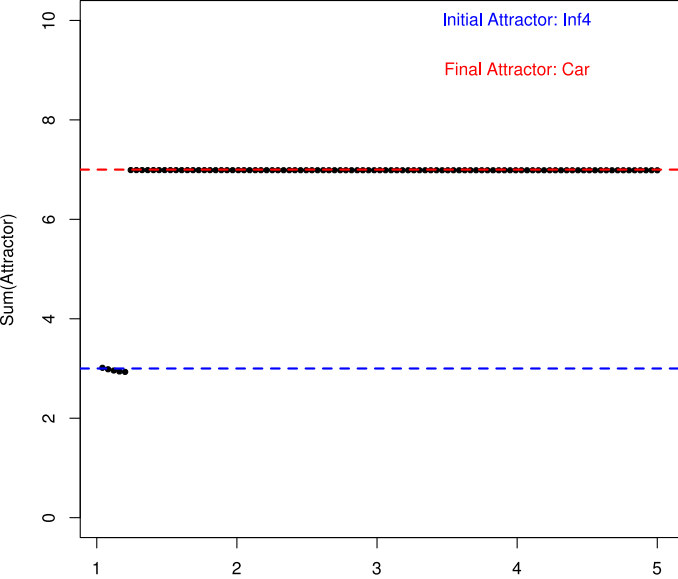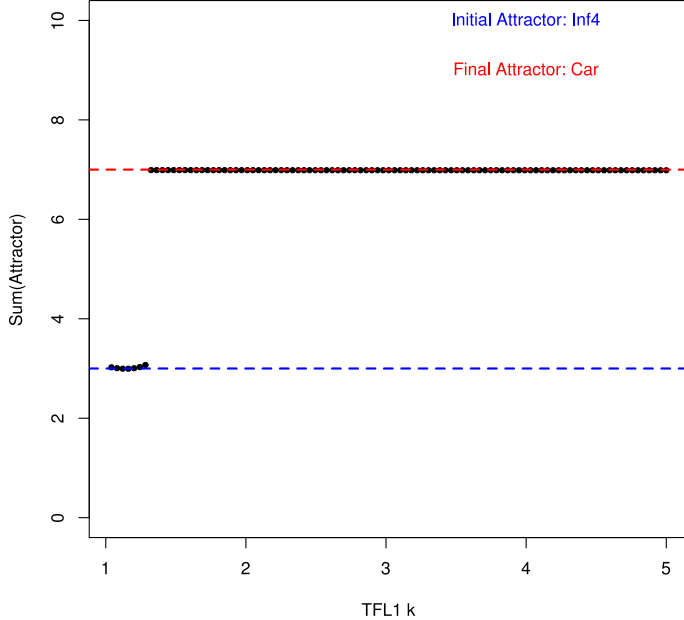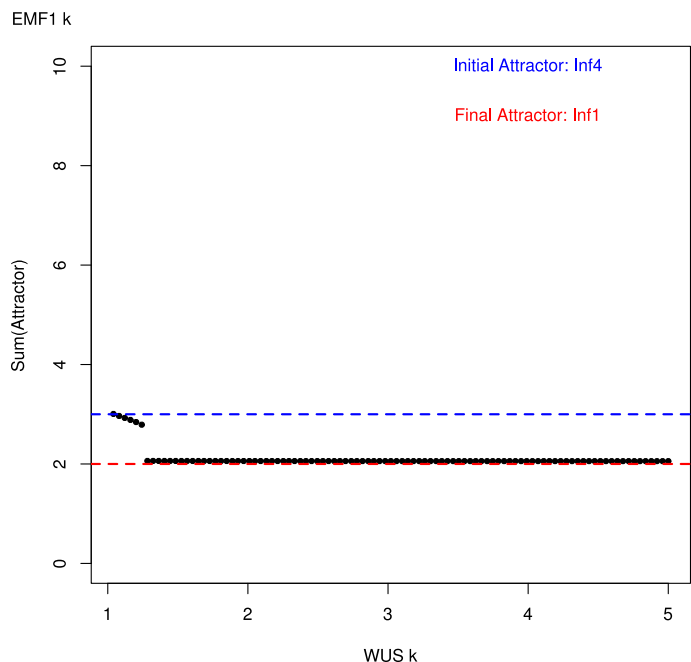

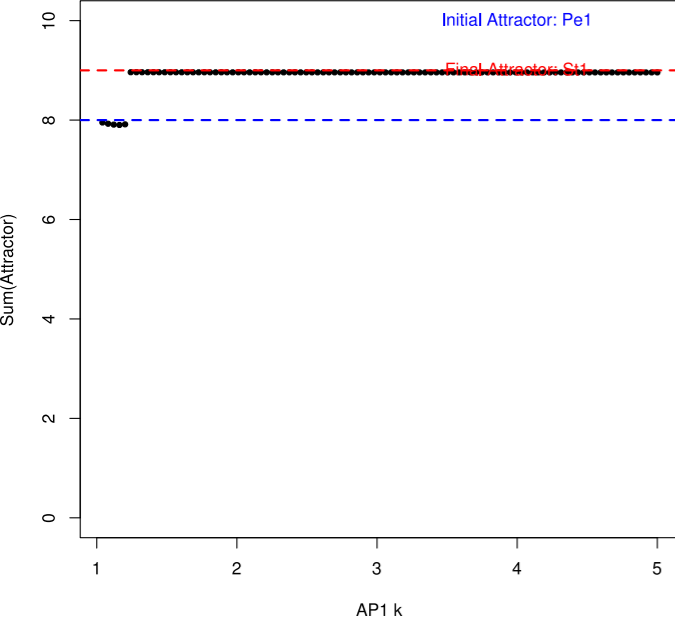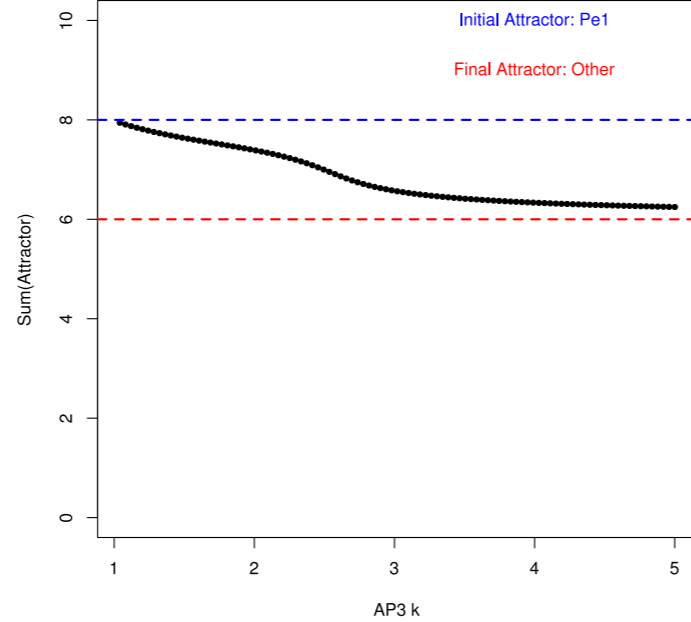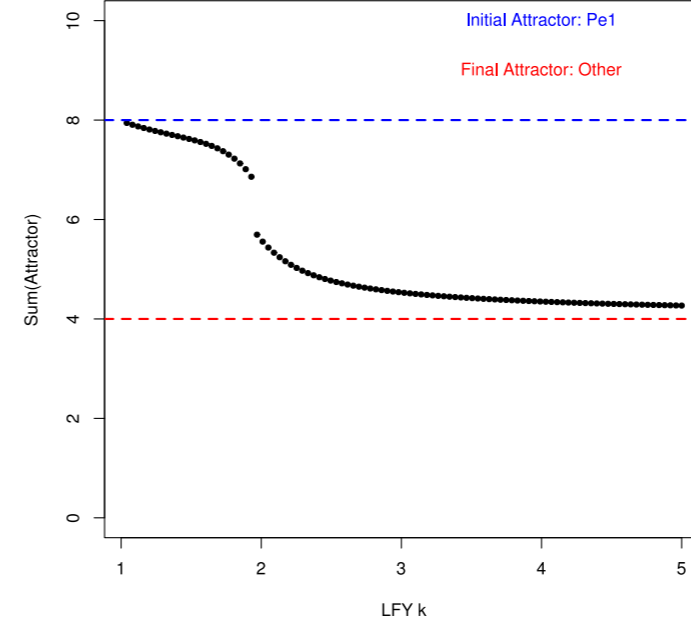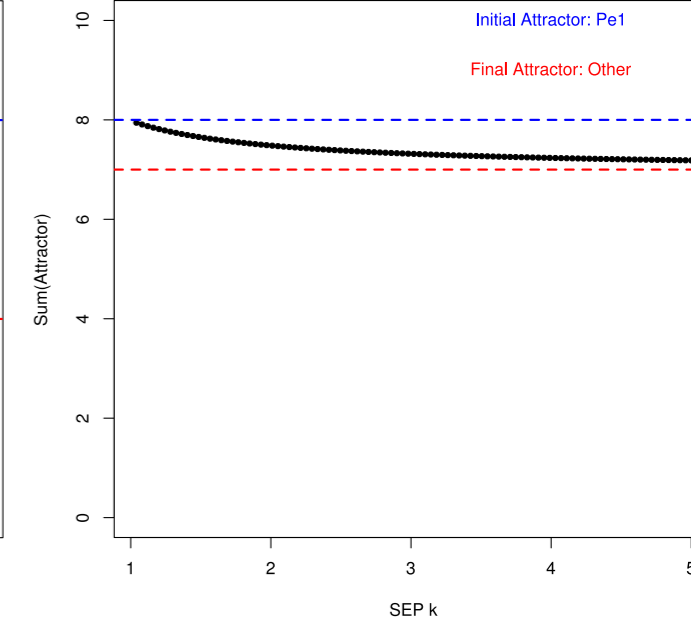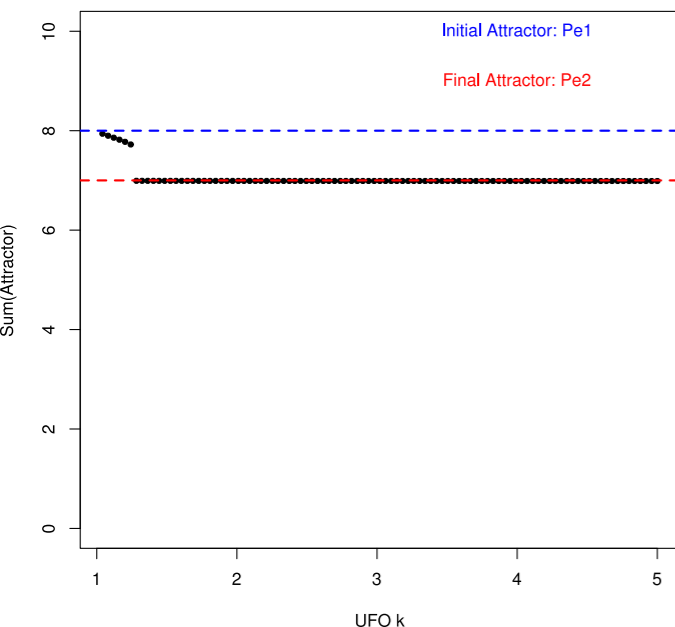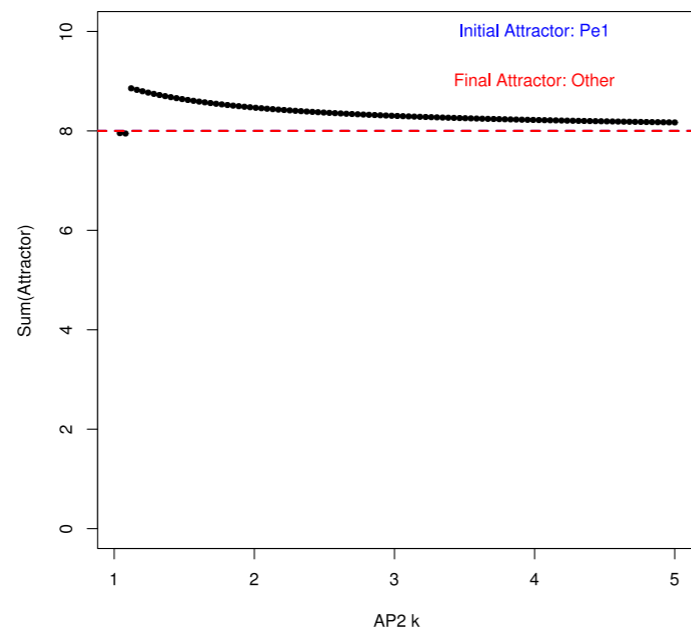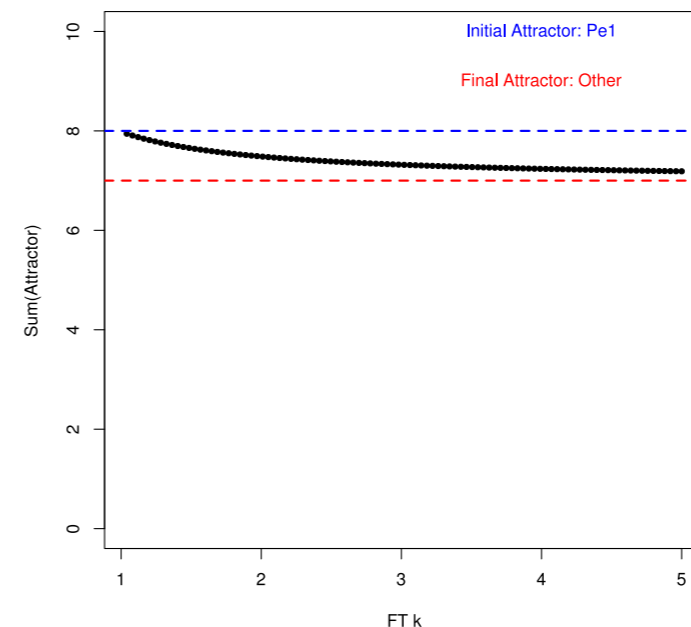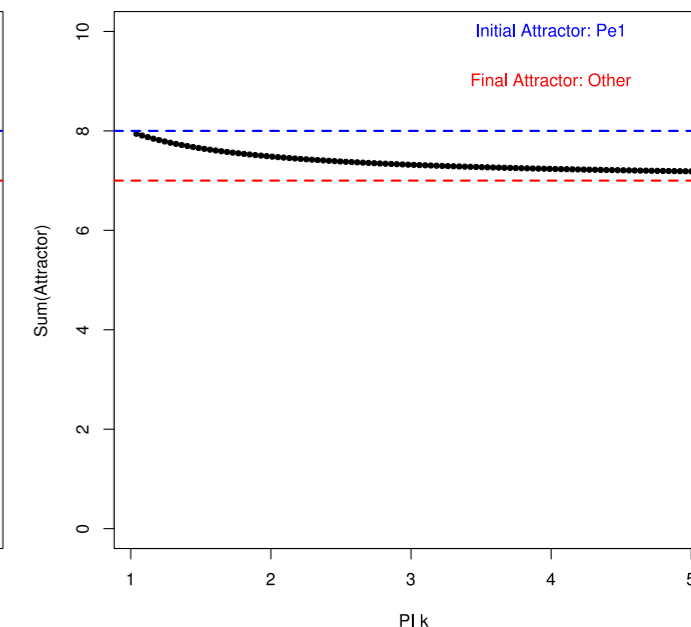

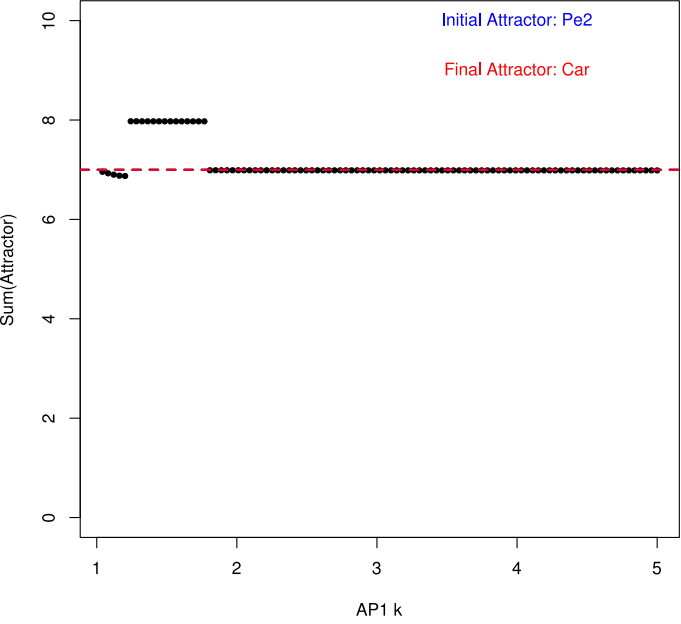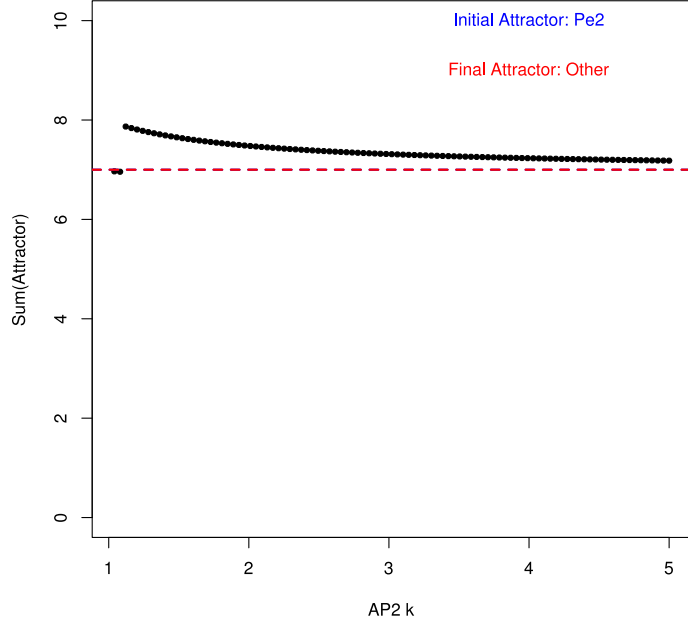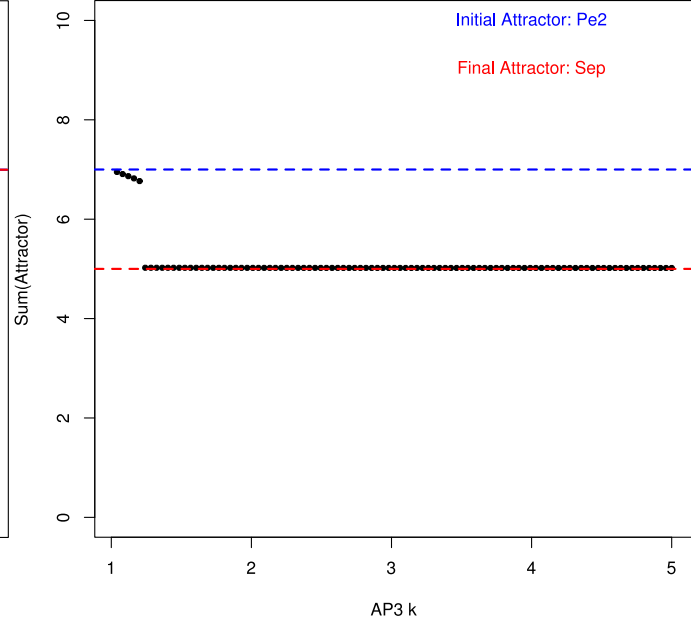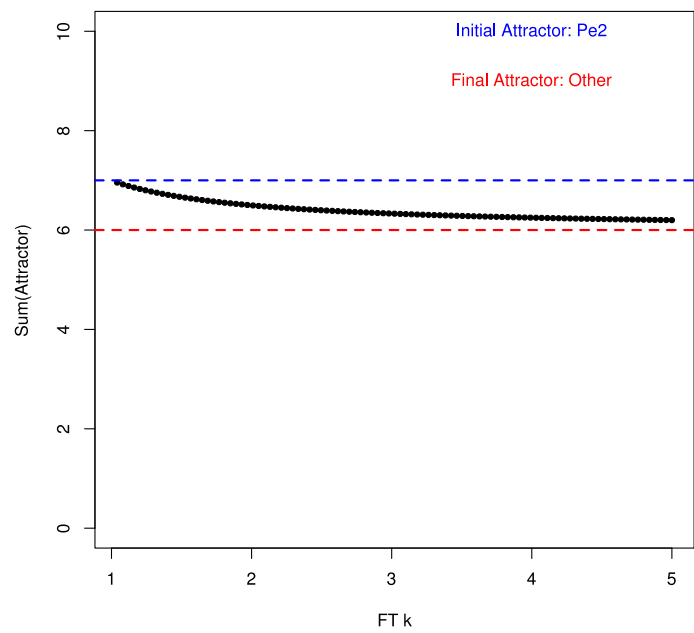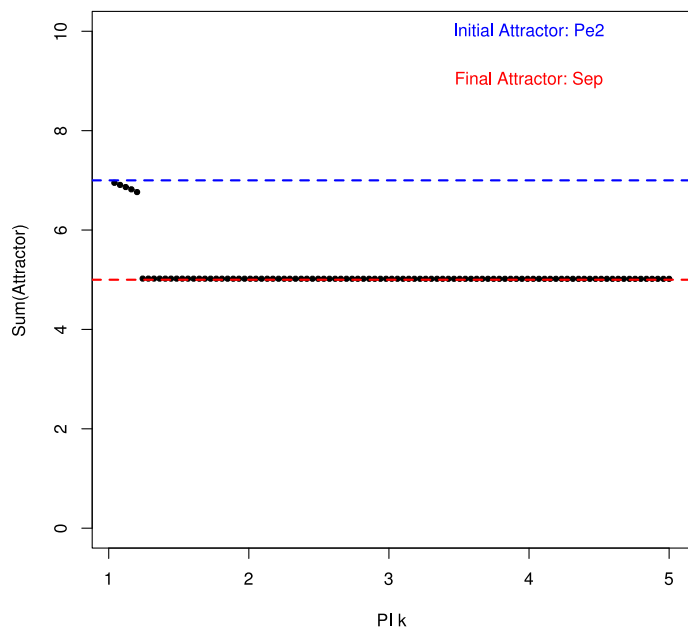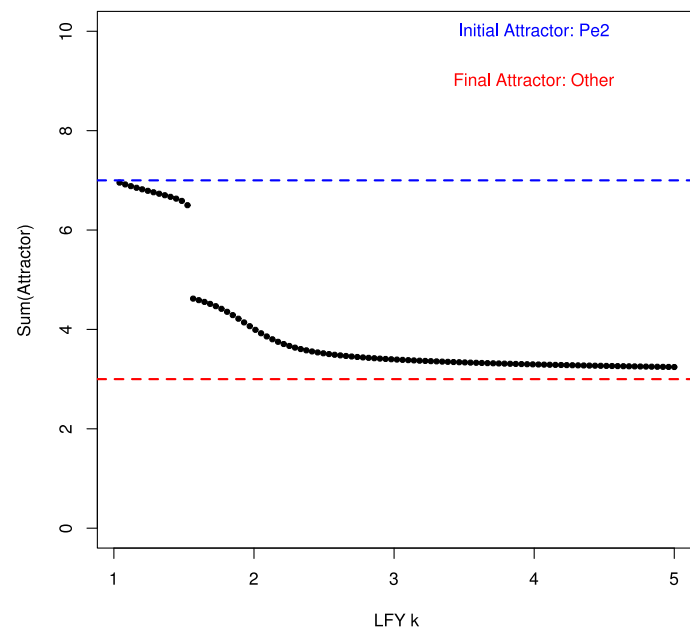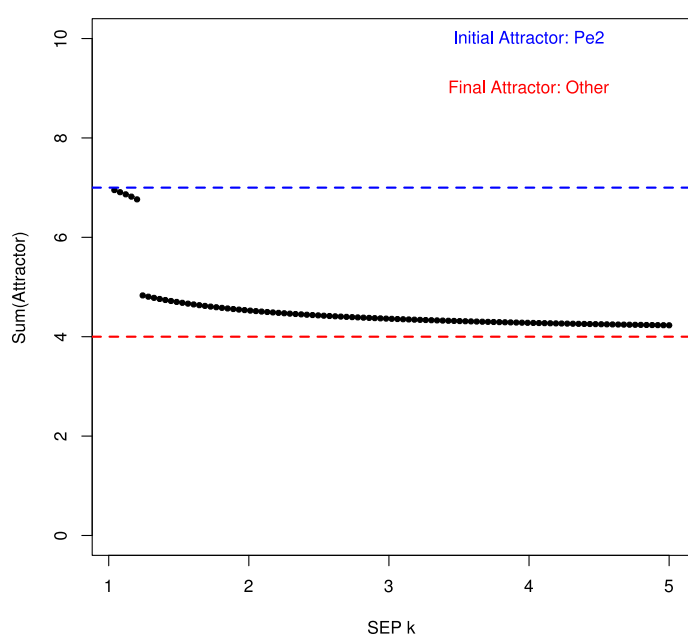



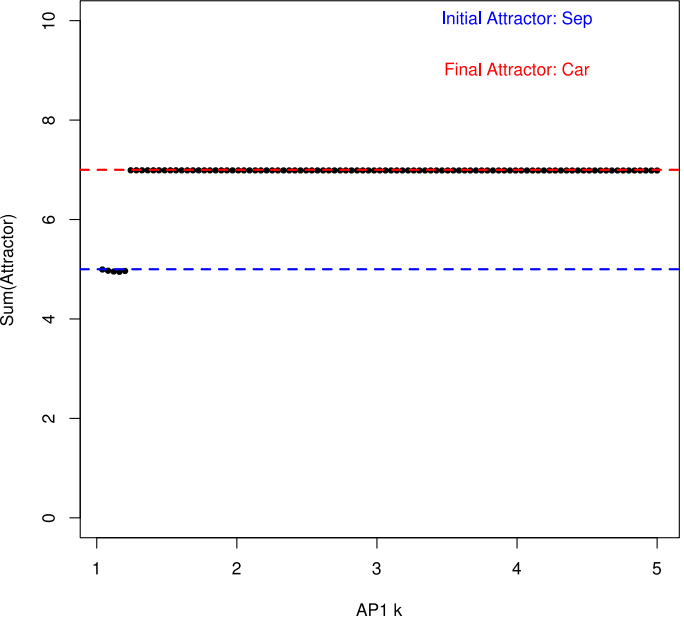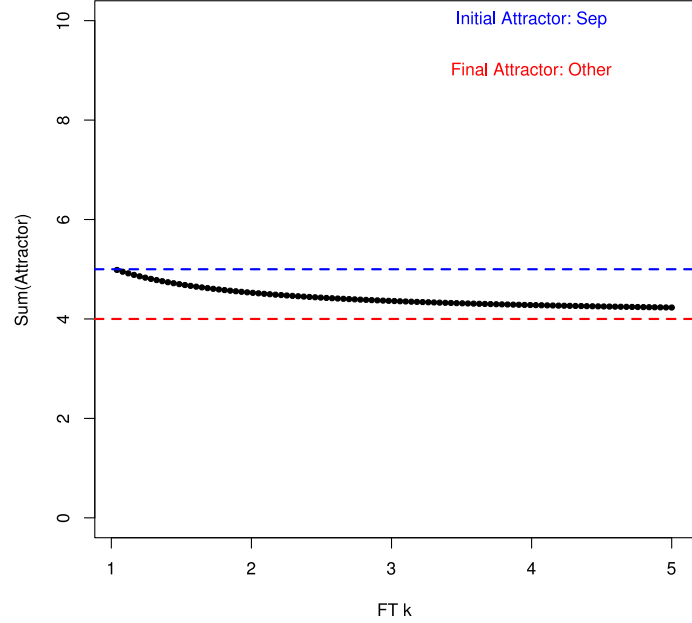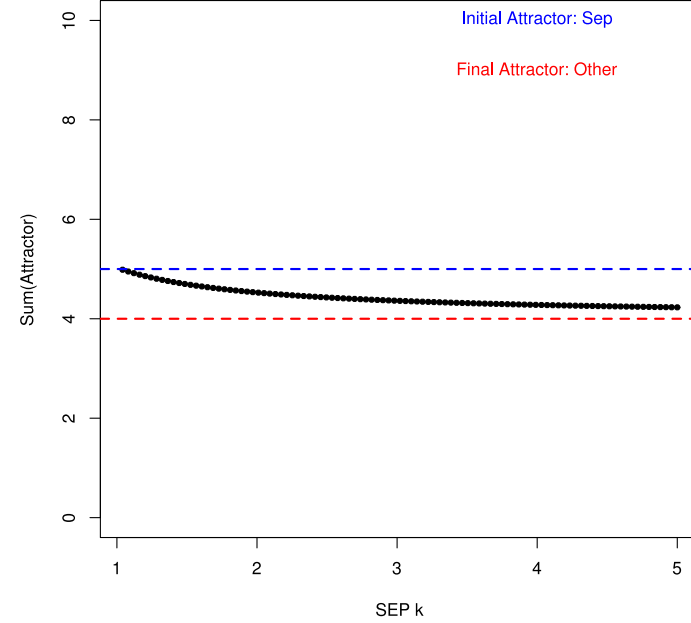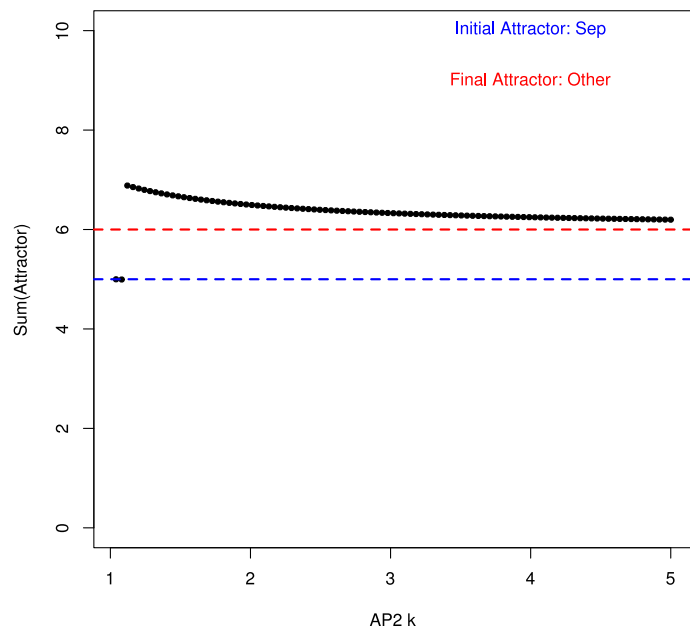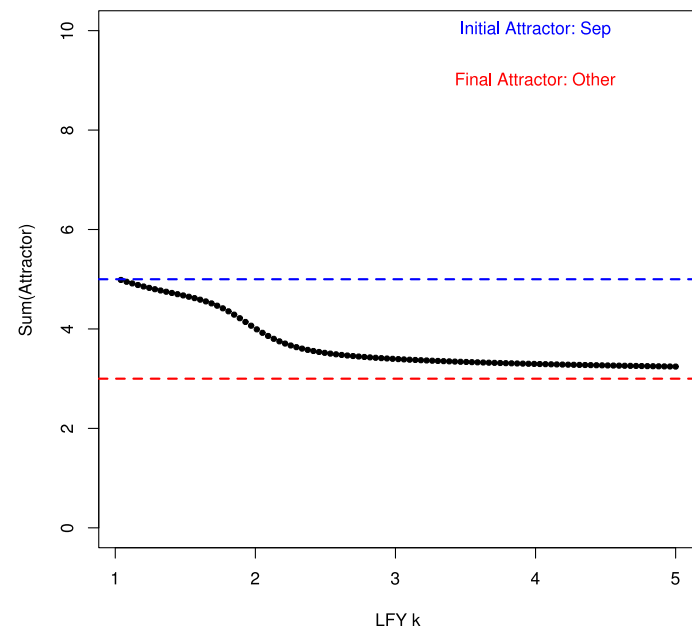

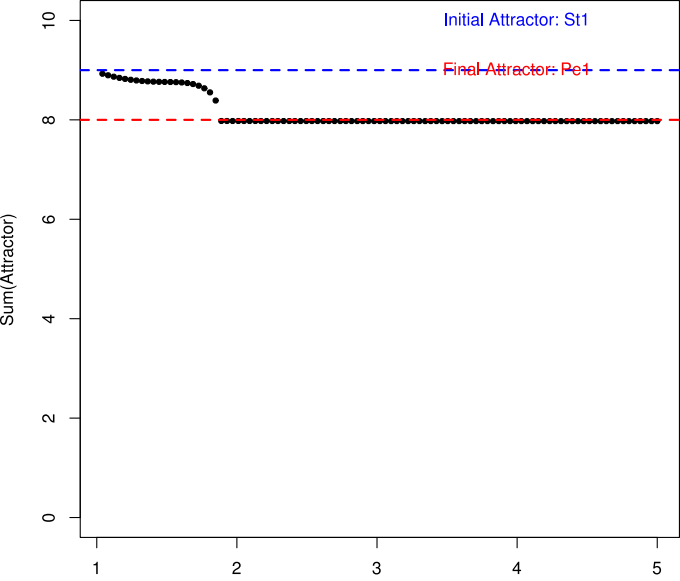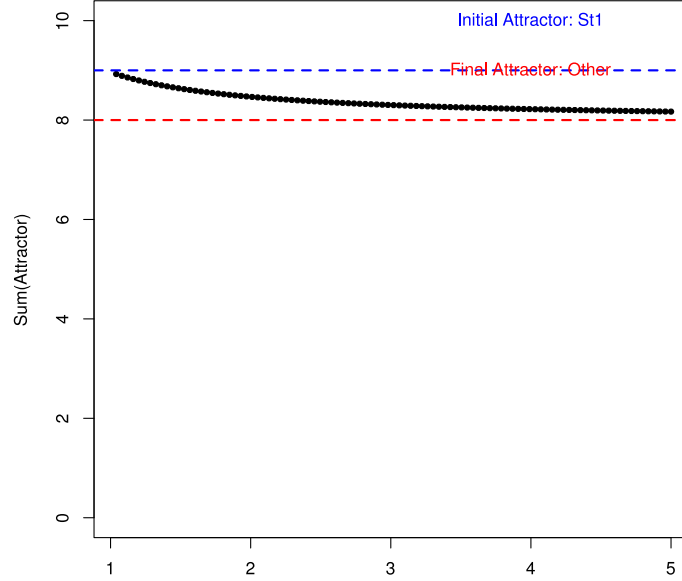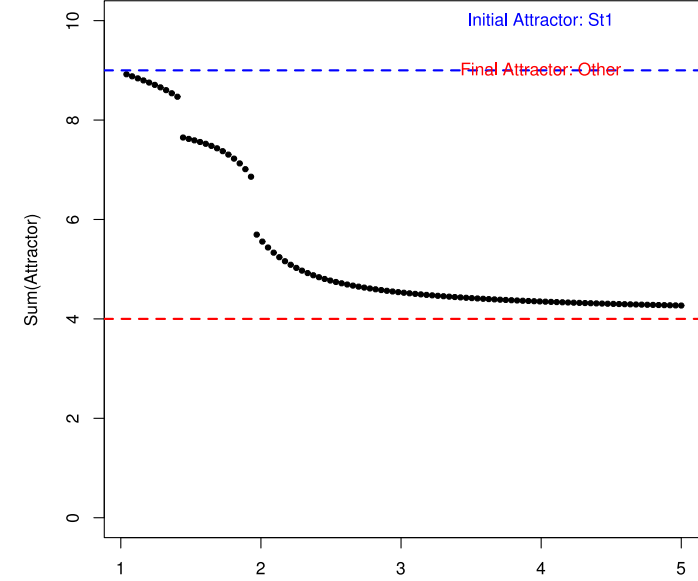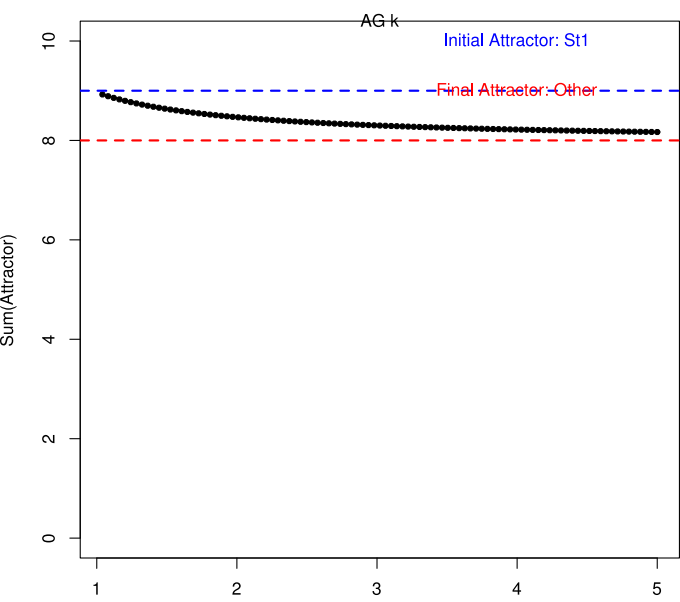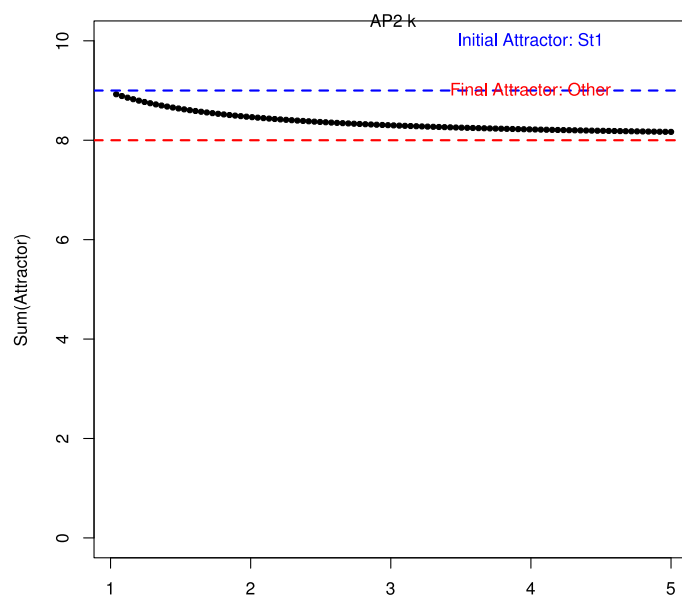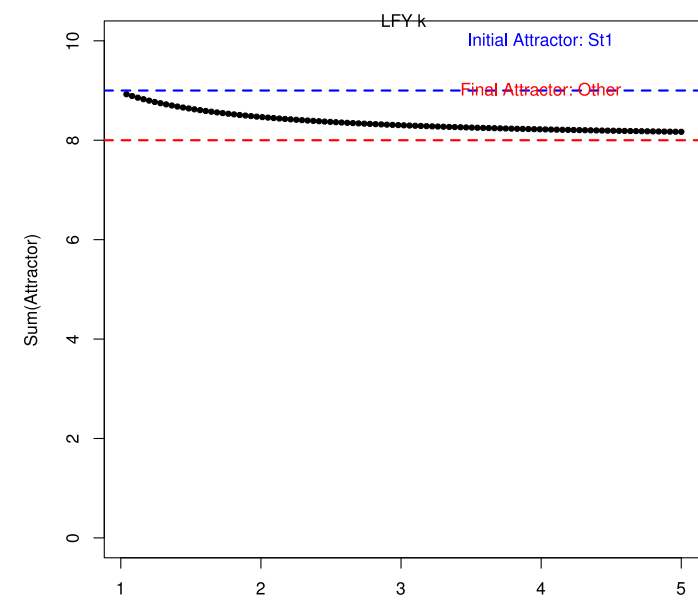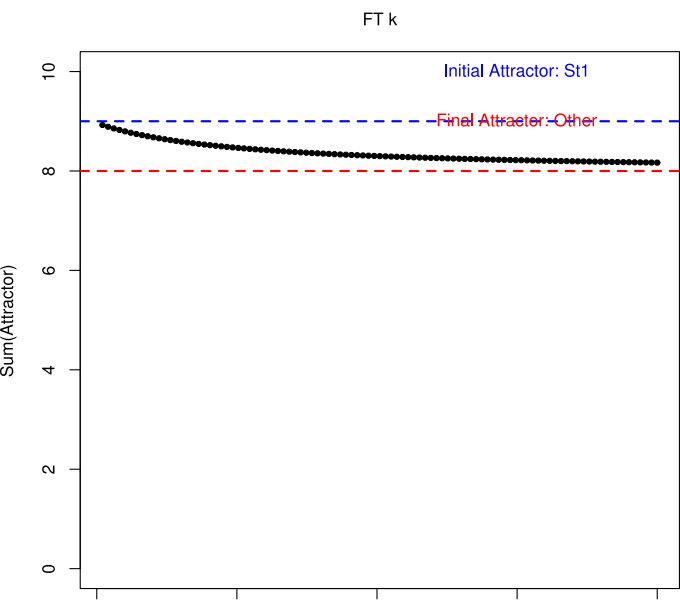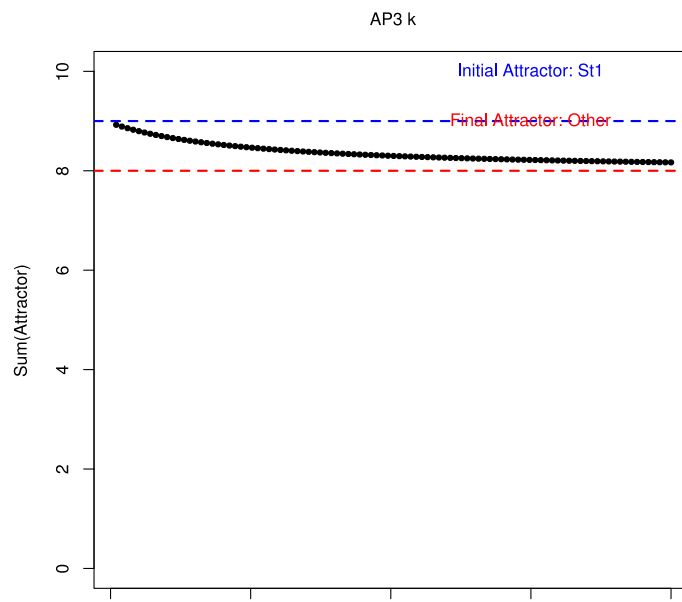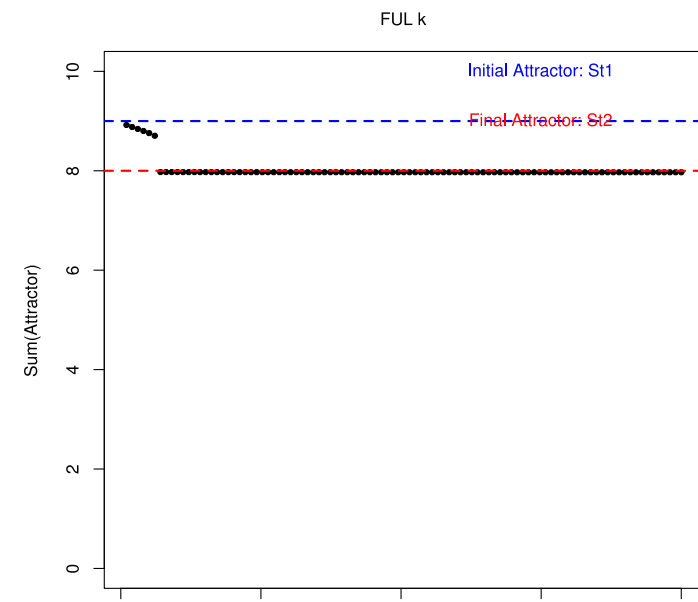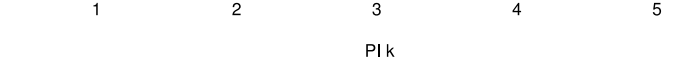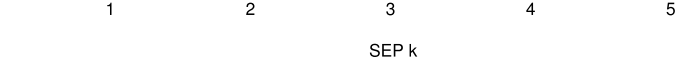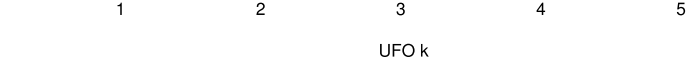

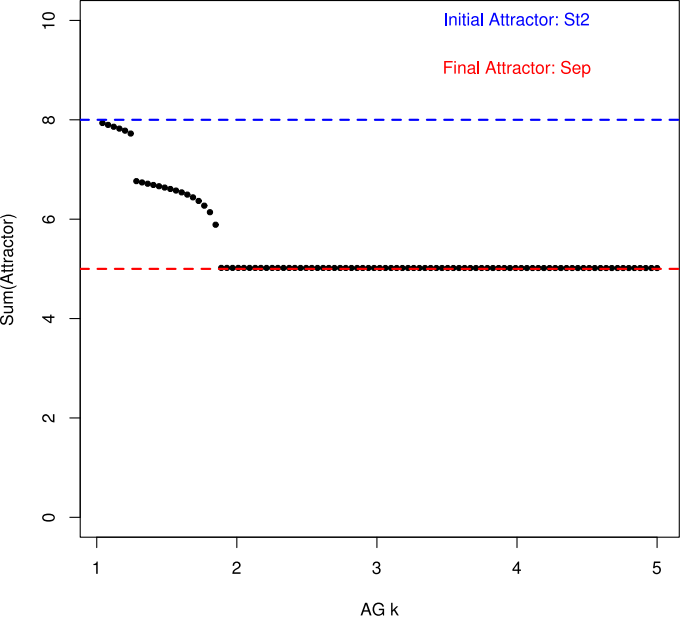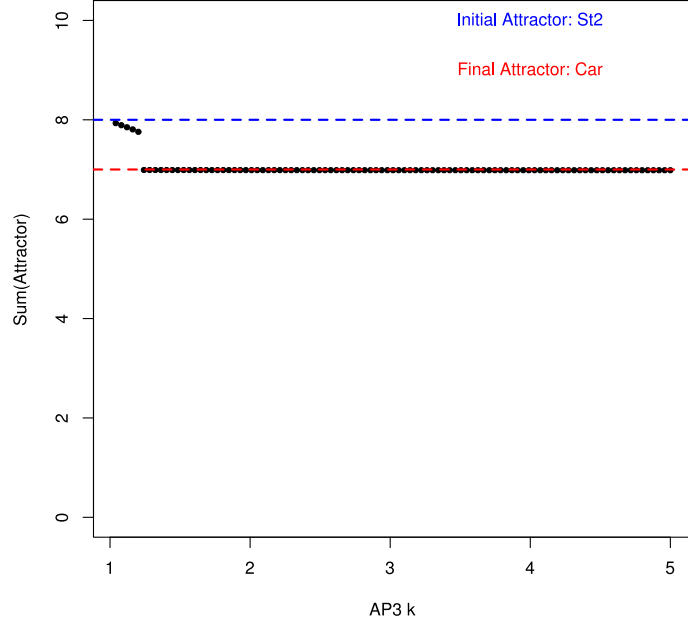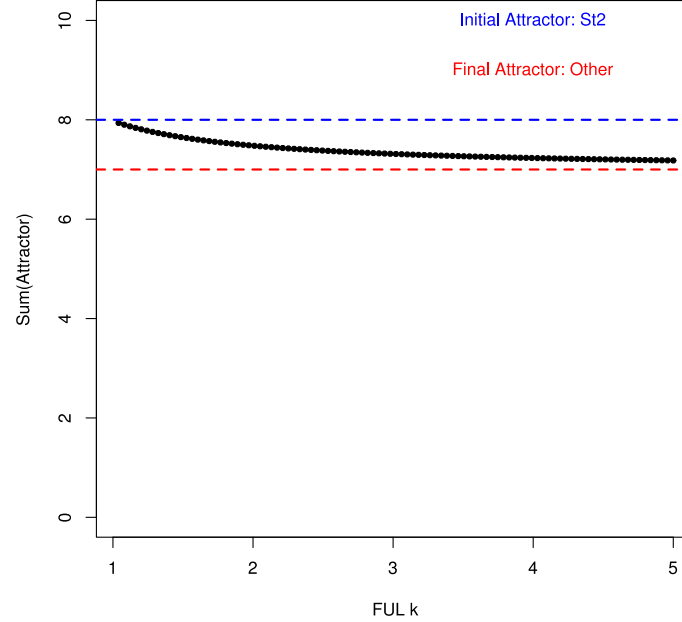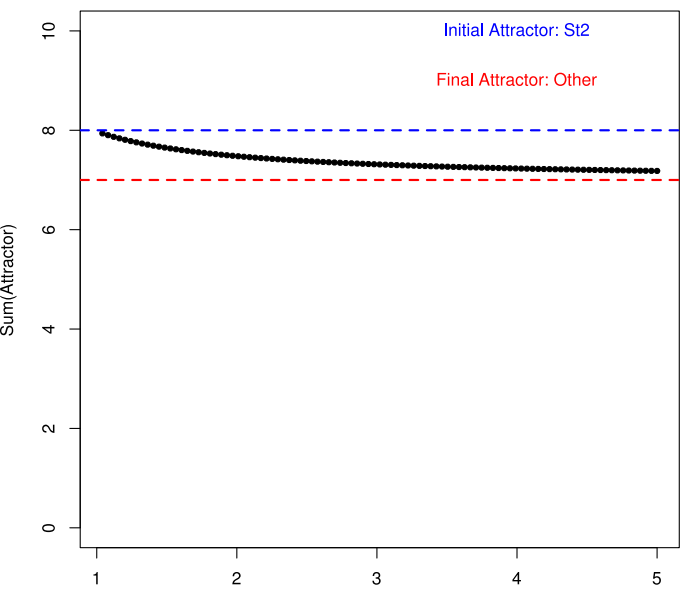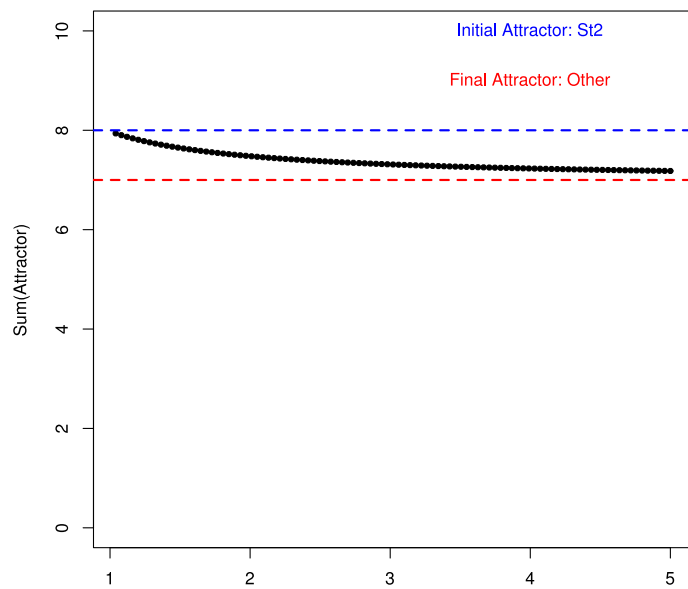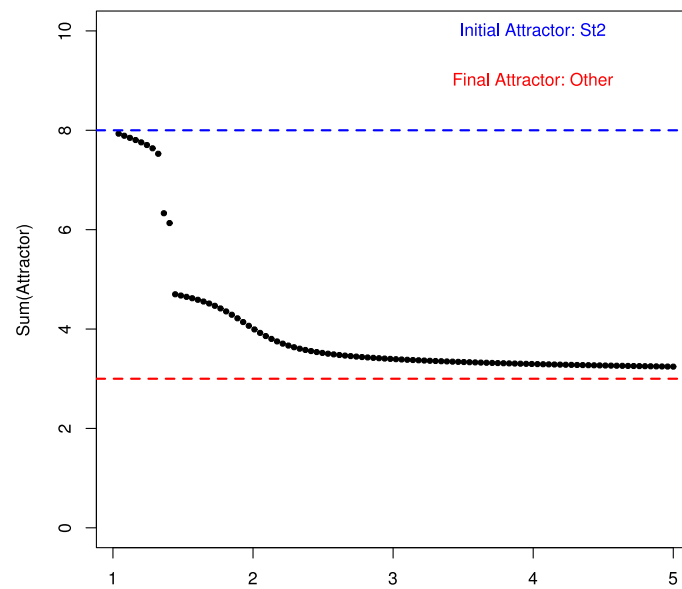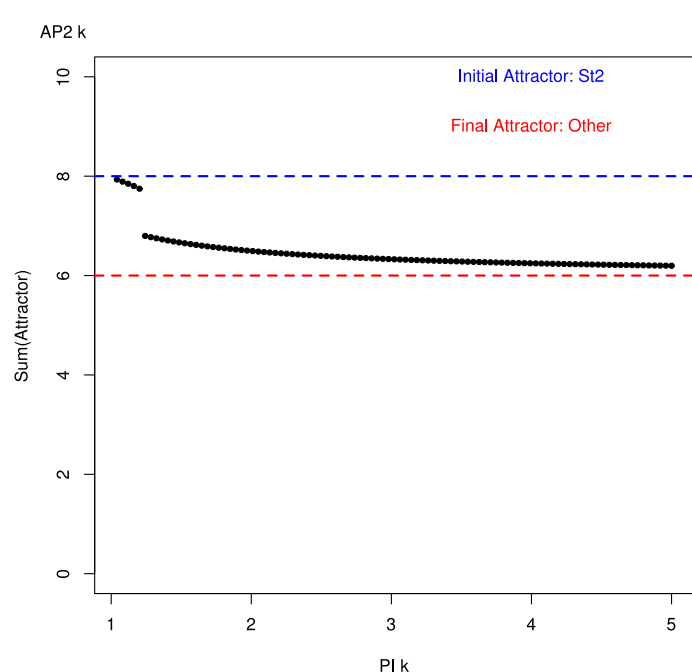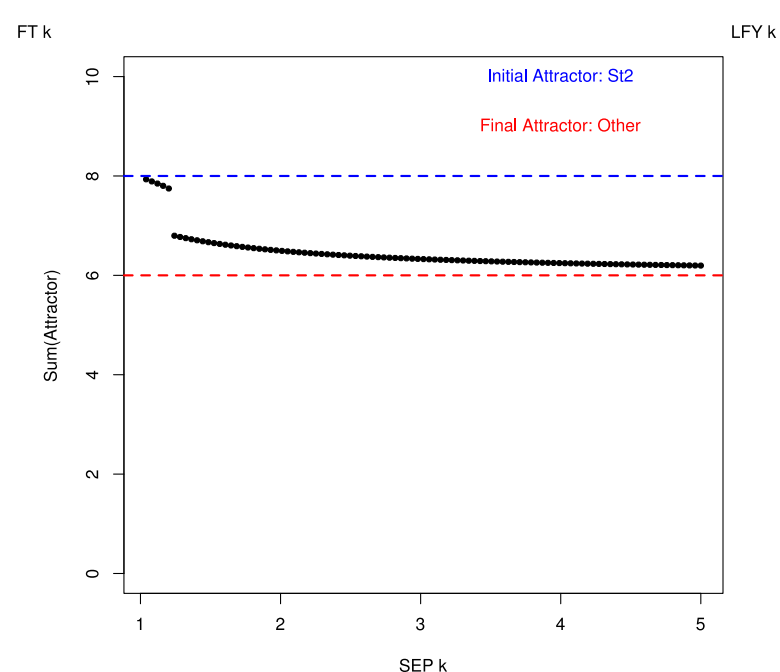

Supplement: 12918_2015_166_MOESM2_ESM.pdf [file 12918_2015_166_MOESM2_ESM.pdf]
