# Supplementary material for: Reshaping the epigenetic landscape during early flower development: induction of attractor transitions by relative differences in gene decay rates
Source: PubMed Central journal article supplement (PMC4438470; doi:10.1186/s12918-015-0166-y), 2015-05-13
Supplement: 12918_2015_166_MOESM1_ESM.pdf [file 12918_2015_166_MOESM1_ESM.pdf]

## Additional File 1

**Figure A1. Boolean FOS-GRN logical update rules.** The figure shows the model used in the study.

**Figure A2. Attractors of the Wild-type Boolean FOS-GRN.** Graphical representation of the 10 point attractors recovered by the dynamical analysis of the Boolean GRN model. Percentages above each column represent the corresponding attractor's basin size.

**Figure A3. ODEs model of the FOS-GRN.** Set of equations obtained after transforming the Boolean GRN model.

**Figure A4. Attractors of the Wild-type ODEs FOS-GRN Model.** Graphical representation of the 10 point attractors recovered by the dynamical analysis of the Boolean GRN model.

**Figure A5. Comparison of the Attractors and Basins Uncovered with the Boolean and ODEs FOS-GRN Models.**

**Table A1. Table summarizing the result of all the bifurcation analyses.** The columns give the following information: Column 1, initial attractors; Column 2, perturbed gene, Column 3, Binary variables indicating whether a phase transition occurred (1) or not (0); Column 4, Attractor reached after the phase transition (NA when there was no transition, Other corresponds to a novel attractor).

**Figure A6. Histogram of the average absolute difference in PT values calculated from simulated networks values.** The graph shows the distribution of the average absolute difference in PT values calculated on an ensemble of 100,000 random networks with the same number of nodes and interactions. The red vertical line indicates the corresponding value for the "real" FOS-GRN model.

| $x_i(t+1)$  | = | $F_i(\mathbf{x}(t))$                                                                                                                                                                                                                                          |
|-------------|---|---------------------------------------------------------------------------------------------------------------------------------------------------------------------------------------------------------------------------------------------------------------|
| $AG(t+1)$   | = | $(\neg EMF1 \wedge \neg AP2 \wedge \neg TFL1) \vee (\neg EMF1 \wedge \neg AP1 \wedge LFY)$<br>$\vee (\neg EMF1 \wedge \neg AP2 \wedge LFY) \vee (\neg EMF1 \wedge \neg TFL1 \wedge LFY \wedge (AG \wedge SEP))$<br>$\vee (\neg EMF1 \wedge (LFY \wedge WUS))$ |
| $AP1(t+1)$  | = | $(\neg AG \wedge \neg TFL1) \vee (FT \wedge LFY \wedge \neg AG) \vee (FT \wedge \neg AG \wedge \neg PI)$<br>$\vee (LFY \wedge \neg AG \wedge \neg PI) \vee (FT \wedge \neg AG \wedge \neg AP3)$<br>$\vee (LFY \wedge \neg AG \wedge \neg AP3)$                |
| $AP2(t+1)$  | = | $\neg TFL1$                                                                                                                                                                                                                                                   |
| $AP3(t+1)$  | = | $(LFY \wedge UFO) \vee (PI \wedge SEP \wedge AP3 \wedge (AG \vee AP1))$                                                                                                                                                                                       |
| $EMF1(t+1)$ | = | $\neg LFY$                                                                                                                                                                                                                                                    |
| $FT(t+1)$   | = | $\neg EMF1$                                                                                                                                                                                                                                                   |
| $FUL(t+1)$  | = | $\neg AP1 \wedge \neg TFL1$                                                                                                                                                                                                                                   |
| $LFY(t+1)$  | = | $\neg EMF1 \vee \neg TFL1$                                                                                                                                                                                                                                    |
| $PI(t+1)$   | = | $(LFY \wedge (AG \vee AP3)) \vee (PI \wedge SEP \wedge AP3 \wedge (AG \vee AP1))$                                                                                                                                                                             |
| $SEP(t+1)$  | = | $LFY$                                                                                                                                                                                                                                                         |
| $TFL1(t+1)$ | = | $\neg AP1 \wedge (EMF1 \wedge \neg LFY)$                                                                                                                                                                                                                      |
| $WUS(t+1)$  | = | $WUS \wedge (\neg AG \vee \neg SEP)$                                                                                                                                                                                                                          |

Figure A1. Boolean FOS-GRN logical update rules.

## Attractors

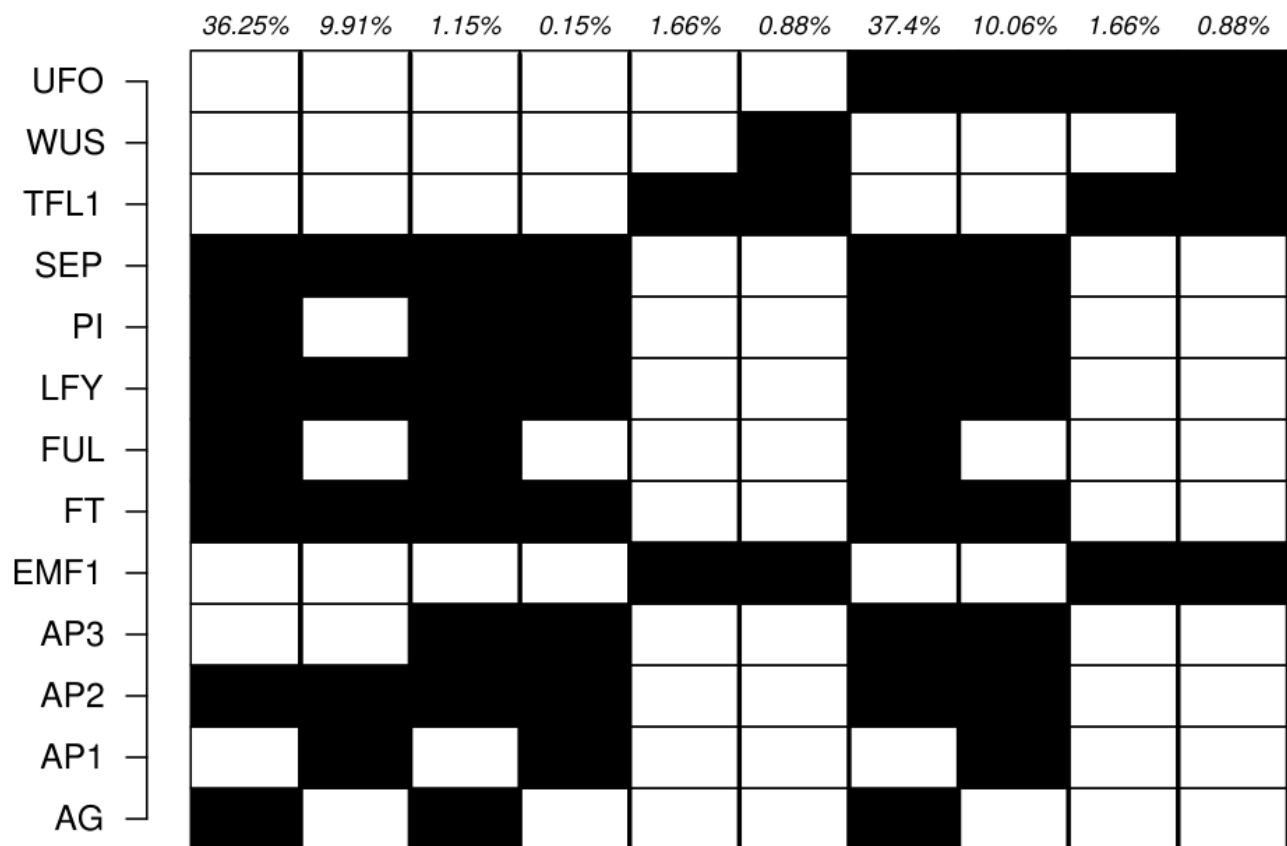

active
  inactive

Figure A2. Attractors of the Wild-type Boolean FOS-GRN .

The ODEs model of the FOS-GRN takes the form:

$$\frac{dx_i}{dt} = \frac{1}{1 + \exp[-b[f_i(x_1, x_2, \dots, x_k) - \epsilon]]} - k_i x_i$$

where:

$$\begin{aligned} f_{AG}(\mathbf{x}) &= LFY \cdot (1 - EMF1) \cdot (1 - ((AP1 \cdot AP2 \cdot (1 - WUS)) \cdot (1 - AG \cdot SEP \cdot (1 - TFL1)))) \\ &+ (1 - EMF1) \cdot (1 - TFL1) \cdot (1 - AP2) \\ &- (LFY \cdot (1 - EMF1) \cdot (1 - ((AP1 \cdot AP2 \cdot (1 - WUS)) \\ &\cdot (1 - AG \cdot SEP \cdot (1 - TFL1)))))) \cdot ((1 - EMF1) \cdot (1 - TFL1) \cdot (1 - AP2)), \\ f_{AP1}(\mathbf{x}) &= (1 - AG) \cdot (1 - TFL1 \cdot (1 - LFY * FT)), \\ f_{FUL}(\mathbf{x}) &= (1 - AP1) \cdot (1 - TFL1), \\ f_{FT}(\mathbf{x}) &= 1 - EMF1, \\ f_{EMF1}(\mathbf{x}) &= 1 - LFY, \\ f_{LFY}(\mathbf{x}) &= 1 - EMF1 \cdot TFL1, \\ f_{AP2}(\mathbf{x}) &= 1 - TFL1, \\ f_{WUS}(\mathbf{x}) &= WUS \cdot (1 - AG \cdot SEP), \\ f_{SEP}(\mathbf{x}) &= LFY, \\ f_{PI}(\mathbf{x}) &= (LFY \cdot (AG + AP3 - AG \cdot AP3)) \\ &+ (PI \cdot SEP \cdot AP3 \cdot (AG + AP1 - AG \cdot AP1)) \\ &- (LFY \cdot (AG + AP3 - AG \cdot AP3)) \cdot (PI \cdot SEP \cdot AP3 \cdot (AG + AP1 - AG \cdot AP1)), \\ f_{AP3}(\mathbf{x}) &= (LFY \cdot UFO) + (PI \cdot SEP \cdot AP3 \cdot (AG + AP1 - AG \cdot AP1)) \\ &- (LFY \cdot UFO) \cdot (PI \cdot SEP \cdot AP3 \cdot (AG + AP1 - AG \cdot AP1)), \\ f_{TFL1}(\mathbf{x}) &= (1 - AP1) \cdot (1 - LFY) \cdot EMF1. \end{aligned}$$

Figure A3. The ODEs model of the FOS-GRN

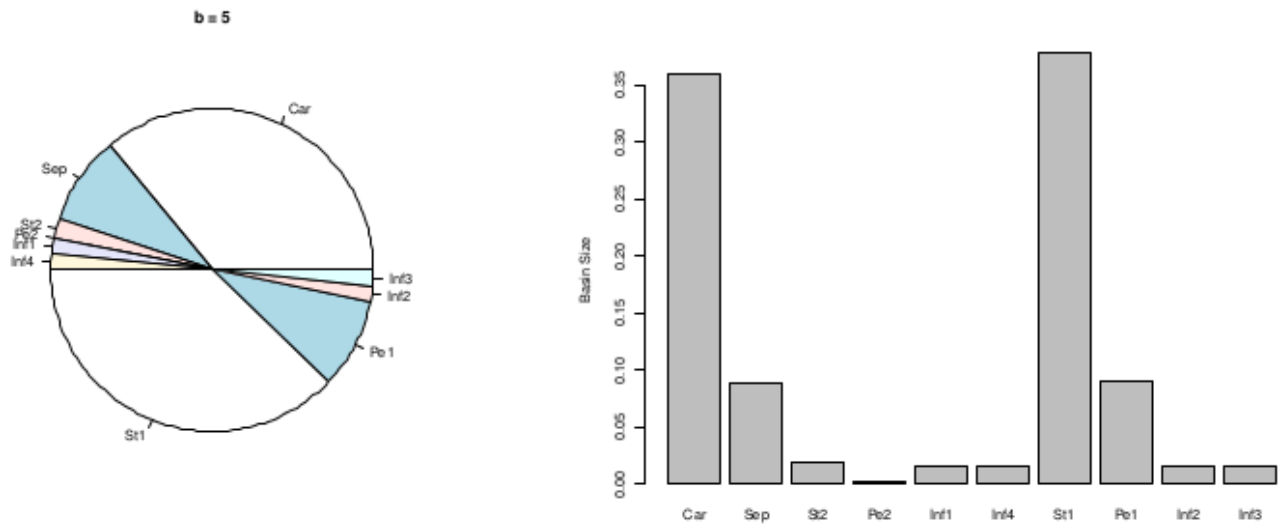

Figure A4. Attractors of the Wild-type ODEs FOS-GRN Model.

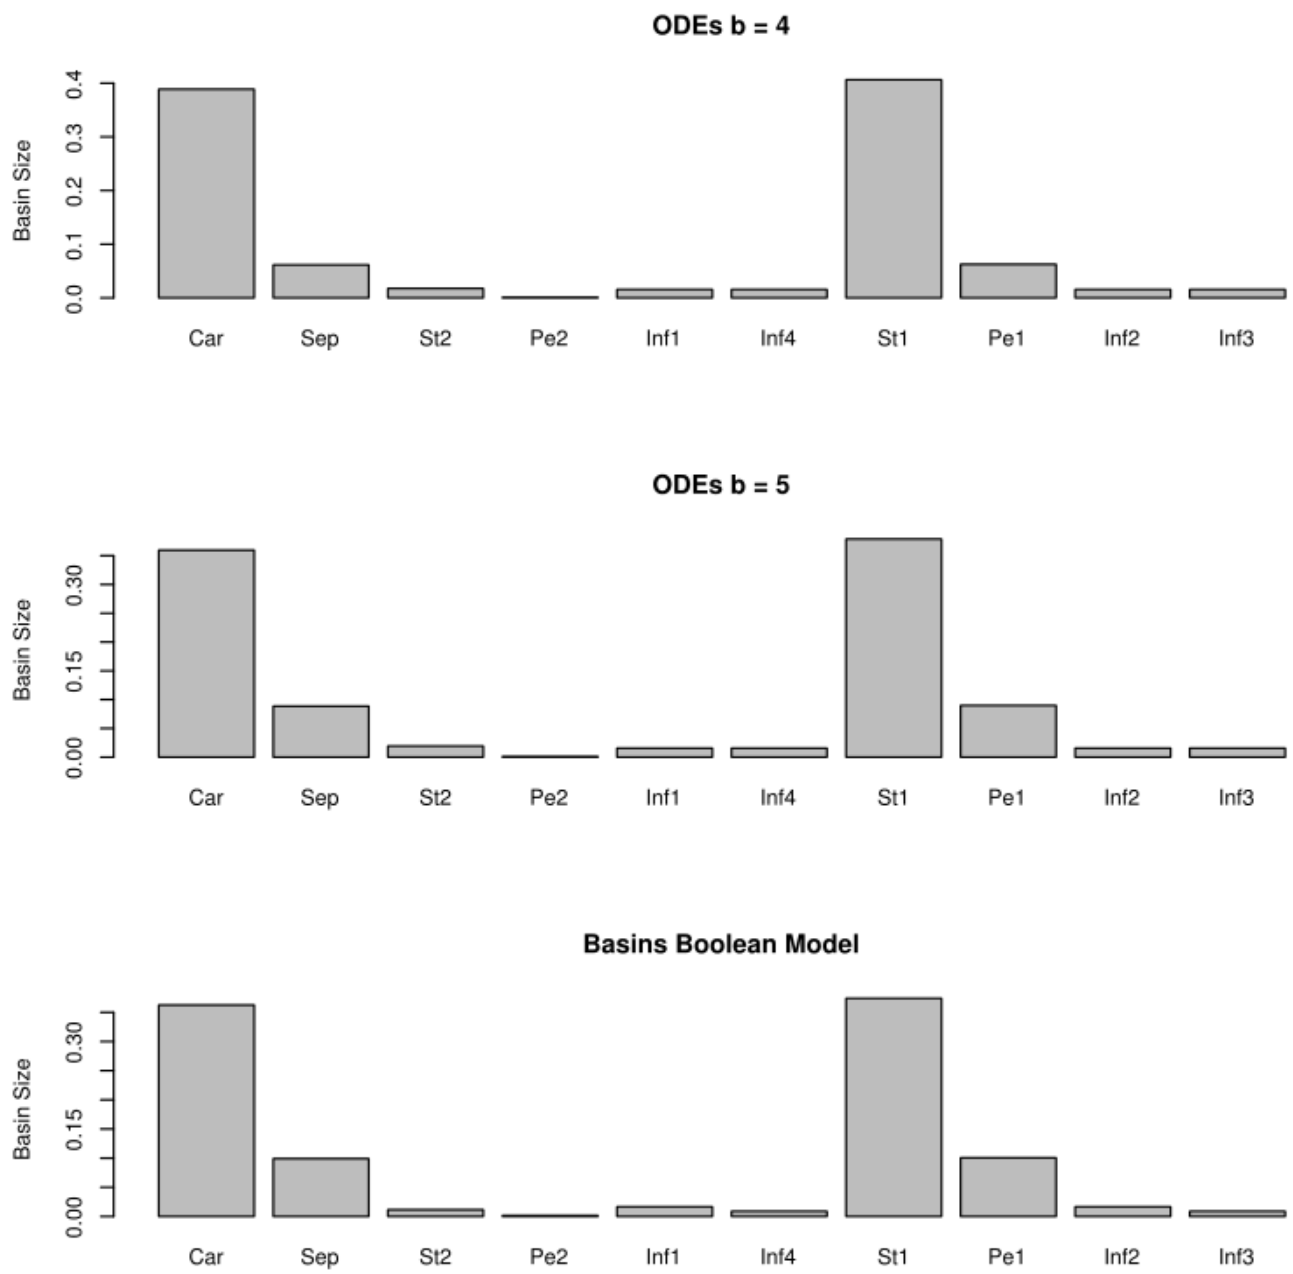

Figure A5. Comparison of the Attractors and Basins Uncovered with the Boolean and ODEs FOS-GRN Models.

| Attractor_0 | Perturbed_Gene | QualitativeChange | Attractor_Fin |
|-------------|----------------|-------------------|---------------|
| Inf1        | TFL1           | 1                 | SEP           |
| Inf1        | EMF1           | 1                 | Car           |
| Inf2        | TFL1           | 1                 | PE1           |
| Inf2        | UFO            | 1                 | Inf1          |
| Inf2        | EMF1           | 1                 | St1           |
| Inf3        | TFL1           | 1                 | St1           |
| Inf3        | UFO            | 1                 | Inf4          |
| Inf3        | EMF1           | 1                 | St1           |
| Inf3        | WUS            | 1                 | Inf2          |
| Inf4        | TFL1           | 1                 | Car           |
| Inf4        | EMF1           | 1                 | Car           |
| Inf4        | WUS            | 1                 | Inf1          |
| Car         | AG             | 1                 | Sep           |
| Car         | LFY            | 1                 | Other         |
| Car         | AP2            | 0                 | NA            |
| Car         | FT             | 0                 | NA            |
| Car         | PI             | 0                 | NA            |
| Car         | FUL            | 0                 | NA            |
| Car         | SEP            | 0                 | NA            |
| Sep         | AP1            | 1                 | Car           |
| Sep         | AP2            | 1                 | Other         |
| Sep         | LFY            | 0                 | NA            |
| Sep         | FT             | 0                 | NA            |
| Sep         | SEP            | 0                 | NA            |
| St2         | AG             | 1                 | Sep           |
| St2         | AP3            | 1                 | Car           |
| St2         | LFY            | 1                 | Other         |
| St2         | PI             | 1                 | Other         |
| St2         | SEP            | 1                 | Other         |
| St2         | AP2            | 0                 | NA            |
| St2         | FT             | 0                 | NA            |
| St2         | FUL            | 0                 | NA            |
| Pe2         | AP1            | 1                 | Car           |
| Pe2         | AP2            | 1                 | Other         |
| Pe2         | AP3            | 1                 | Sep           |
| Pe2         | LFY            | 1                 | Other         |
| Pe2         | PI             | 1                 | Sep           |
| Pe2         | SEP            | 1                 | Other         |
| Pe2         | FT             | 0                 | NA            |
| St1         | AG             | 1                 | PE1           |
| St1         | LFY            | 1                 | Other         |
| St1         | UFO            | 1                 | St2           |
| St1         | AP2            | 0                 | NA            |
| St1         | AP3            | 0                 | NA            |
| St1         | FT             | 0                 | NA            |
| St1         | FUL            | 0                 | NA            |
| St1         | PI             | 0                 | NA            |
| St1         | SEP            | 0                 | NA            |
| St1         | FUL            | 0                 | NA            |
| Pe1         | AP1            | 1                 | St1           |
| Pe1         | AP2            | 1                 | Other         |
| Pe1         | AP3            | 0                 | NA            |
| Pe1         | LFY            | 1                 | Other         |
| Pe1         | UFO            | 1                 | Pe2           |
| Pe1         | FT             | 0                 | NA            |
| Pe1         | PI             | 0                 | NA            |
| Pe1         | SEP            | 0                 | NA            |

Table A1. Summary of all the bifurcation analyses.

### Empirical Distribution Across Simulated Networks

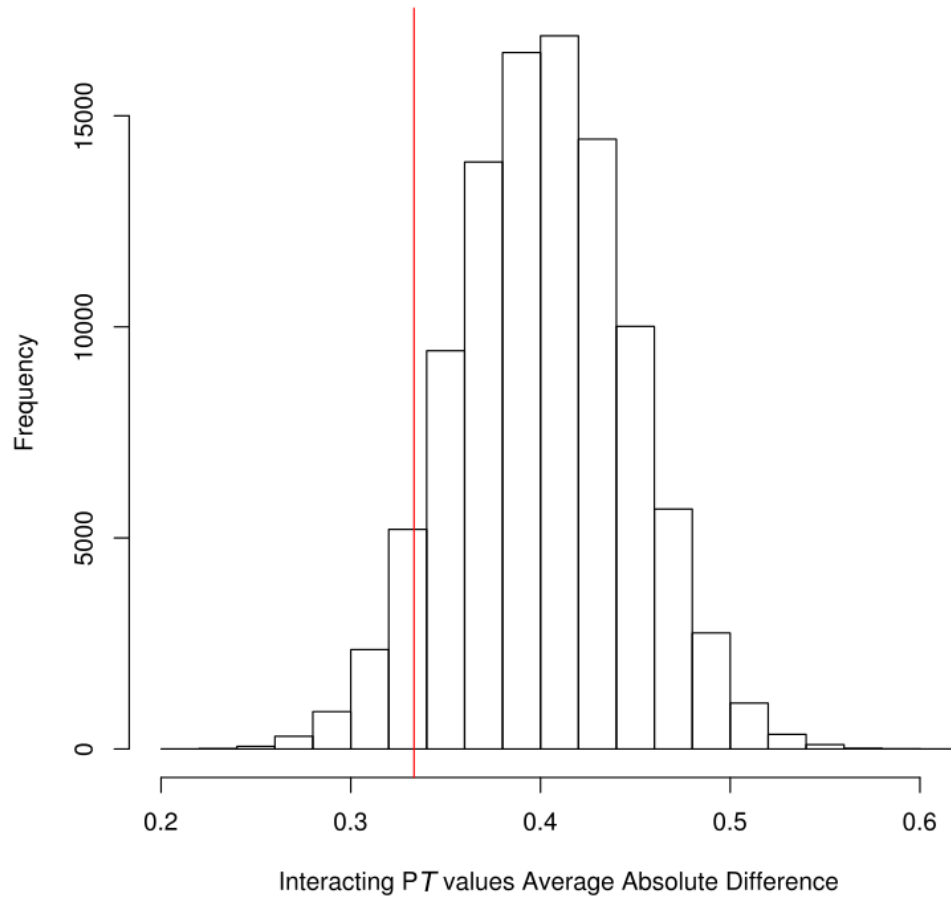

**Figure A6. Histogram of the AAD in PT values calculated from simulated networks values.**
